# Supplementary material for: Forest tree genomics: 10 achievements from the past 10 years and future prospects
Source: Springer Nature journal article supplement (doi:10.1007/s13595-015-0488-3), 2015-06-11
Supplement: MOESM1 [file 13595_2015_488_MOESM1_ESM.doc]

**Glossary**

- **Adaptability, evolvability or adaptive potential**: the ability of populations to maintain their viability in spite of environmental variations in space and time, through mechanisms such as phenotypic plasticity and genetic diversity.
- **Bayesian methods:** methods applying Bayesian model fitting, a generic category of model fitting methods that rests on the application of Bayesian inference. (http://en.wikipedia.org/wiki/Bayesian_inference)
- **Clonal propagation**: asexual reproduction, vegetative multiplication of selected individual (e.g. cuttings, grafting, micropropagation, somatic embryogenesis, etc.).
- **CNV** (Copy Number Variation): a variation in the number of copies of a particular DNA sequence.
- **Common garden test (or experiment)**: a field test designed to compare different genotypes in a controlled environment, where phenotypic differences among individuals can be simply related to their genotype. Multi-site common garden experiments make it possible to measure genetic diversity and phenotypic plasticity in specific traits.
- **Early embryogenesis:** early embryo development phase resulting in apical-basal embryo patterning driven by polar auxin transport.
- **Embryogenic masses**: a group of cells with ability to differentiate somatic embryos.
- **Embryonic phase:** dedifferentiation process of totipotent cells from explant to become embryogenic (embryogenic induction).
- **Epigenetics**: Epigenetics is an emerging field of science that studies heritable changes caused by the activation and deactivation of genes without any change in the underlying DNA sequence of the organism. The word epigenetics is of Greek origin and literally means over and above (epi) the genome. (<http://www.genome.gov/Glossary/>)
- **Epigenome**: The term is derived from the Greek word epi which literally means "above" the genome. The epigenome consists of chemical compounds that modify, or mark, the genome in a way that tells it what to do, where to do it, and when to do it. Different cells have different epigenetic marks. These epigenetic marks, which are not part of the DNA itself, can be passed on from cell to cell as cells divide, and from one generation to the next. (<http://www.genome.gov/Glossary/>)
- **Epigenomic/epigenetic**: related to genome expression rather than genome structure.
- **Epigenomics**: is a field of research and a set of methods to study all the chemical tags on the genome that control the activities of genes called the epigenome. This is different from genomics, which is the study of all the changes that occur in the order, or sequence, of the DNA building blocks that make up the genome. (<http://www.genome.gov/27532724>)
- **epistatic selection:** selection affecting multi-locus genotypic combinations (i.e. the selective value of a multi-locus genotype has at least some non-additive components)
- **eQTL** (Expression Quantitative Trait Loci): genomic regions correlated to the variation of gene expression.
- **Fitness**: the selective value of a phenotype, i.e. its relative capacity to contribute genes to the next generations, often measured as its potential to grow and reproduce.
- **Forest genetic resources**: genetic material (adult organisms, seedling, seeds, grafts, cuttings) of shrub and tree species of actual or future value for the livelihood of mankind. By extension, it can be considered as a synonym of the genetic diversity of currently important trees and shrubs.
- **Gene flow**: the actual or historical transfer of genes and alleles among populations or organisms within a population. In forest trees, gene flow is achieved through pollen and seed movement which can reach considerable distances. It is one of the major processes that affects (usually increases) the genetic diversity of a population.
- **Gene**: a segment of DNA carrying heritable genetic information. A locus (plural loci) can refer to a gene, a part of it or to non-genic DNA sequence.
- **Genetic diversity**: the total number of allelic and genotypic variants in a population or species. Genetic diversity can be measured for genes underlying traits under selection (with an effect on the phenotype, hence **adaptive genetic diversity**) and for DNA regions (within or outside genic space) with no specific or detectable function (**neutral markers**). Popular measures of genetic diversity include allelic richness, heterozygosity, nucleotide diversity, the ratio between synonymous and non-synonymous mutations, etc.
- **Genetic drift**: The change of genetic diversity in a population of finite size due to random sampling of alleles from one generation to the next. It is one of the major processes that affects (reduces) the genetic diversity of a population.
- **Genomic**: related to the genome structural information (structure of genes or any DNA sequence with known or unknown function).
- **Genomics**: the study of entire genomes, as opposed to classical genetics where few genes are studied together.
- **Genotype**: the collection of allelic variants (from the complete genome or a subset of genes of interest) of a given organism or population, and, by extension, the organism or population itself.
- **GWAS** (Genome Wide Association Study): an association study between phenotypic variation and the genotypic variation assessed genome wide.
- **Hexaploidy**: Hexaploidy can form in either one step (instant triplication of the genome) or two steps (first tetraploidy, and second a tetraploid gamete fuses with a diploid gamete creating a sterile triploid which then regains fertility by doubling its genome again, creating a hexaploid). (<https://genomevolution.org/wiki/index.php/Main_Page>).
- **Hypersensitive response (HR):** mechanism, used by [plants](http://en.wikipedia.org/wiki/Plants), to prevent the spread of [infection](http://en.wikipedia.org/wiki/Infection) by [microbial](http://en.wikipedia.org/wiki/Microbial) [pathogens](http://en.wikipedia.org/wiki/Pathogen). The HR is characterized by the rapid [death](http://en.wikipedia.org/wiki/Apoptosis) of cells in the local region surrounding an infection.
- **landscape genetics:** the study of the effect of barriers to dispersal on the genetic structure of populations, carried out at the landscape level.
- **Late embryogenesis:** embryo development phase resulting in radial embryo patterning up to the cotyledonary embryo stage. This phase is usually triggered by abscisic acid-dependent regulation of genes.
- **LD** (Linkage Disequilibrium): the non random association between the alleles of two loci.
- **Metabolomics**: refers to high-throughput acquisition of quantitative and qualitative data on multiple intracellular (metabolic fingerprinting) or extracellular metabolites (metabolic footprinting).
- **MicroRNA:** one type of small RNA involved into the complex of epigenetic regulation of gene expression. MicroRNAs are specifically involved in post-transcriptional silencing of genes.
- **Molecular breeding (or marker assisted selection or marker aided selection (MAS))**: process whereby a [marker](http://en.wikipedia.org/wiki/Biological_marker) ([morphological](http://en.wikipedia.org/wiki/Morphological), [biochemical](http://en.wikipedia.org/wiki/Biochemical) or one based on [DNA](http://en.wikipedia.org/wiki/DNA)/[RNA](http://en.wikipedia.org/wiki/RNA) variation) is used for indirect [selection](http://en.wikipedia.org/wiki/Selection) of a genetic determinant or determinants of a trait of interest (e.g. productivity, disease resistance, abiotic stress tolerance, and quality). (Wikipedia)
- **mQTL** (Metabolite Quantitative Trait Loci): genomic regions correlated to the variation of metabolite levels.
- **NAC domain** : refers to a conserved domain first identified in Petunia NAM and Arabidopsis ATAF1, ATAF2, and CUC2 proteins. It is an N-terminal module of ~160 amino acids, which is found in proteins of the NAC family of plant-specific transcriptional regulators (<http://www.ebi.ac.uk/interpro/entry/IPR003441>).
- **Next-generation sequencing:** high-throughput sequencing technologies that [parallelize](http://en.wikipedia.org/wiki/Multiplex_(assay)) the sequencing process, producing thousands or millions of sequences concurrently. (Wikipedia)
- **omics**: informally refers to a field of study in [biology](http://en.wikipedia.org/wiki/Biology) ending in *-omics*, such as [genomics](http://en.wikipedia.org/wiki/Genomics), [proteomics](http://en.wikipedia.org/wiki/Proteomics) or [metabolomics](http://en.wikipedia.org/wiki/Metabolomics). (Wikipedia)
- **Paleohexaploidy**: triplication of the genome resulting from ancient events of whole genome duplications.
- **PAMP**: Acronym for pathogen-associated molecular patterns, the molecular signals or elicitors from pathogens that are recognized by plant or animal receptors and can influence innate immunity of the host. (<http://en.wikipedia.org/wiki/Pathogen-associated_molecular_pattern>)
- **PAV** (Presence/Absence Variant): a variation in the presence of a particular DNA sequence.
- **Phenotype**: the collection of traits of an organism, resulting from the interaction of its genome with the environment.
- **Phenotypic plasticity**: the direct influence of the environment on the development of individual phenotypes. Phenotypic plasticity exists when the same genotypes express different phenotypes in different environments. It is measured for a given morphological or functional trait as the range of phenotypes a given genotype can express over several environments (e.g. in a series of common garden tests).
- **Phylogenetics**: discipline that studies the evolutionary relationships among taxa using genetic information.
- **Phylogenic analyses and phylogenetics**: In biology, phylogenetics is the study of evolutionary relationships among groups of organisms (e.g. species, populations), which are discovered through molecular sequencing data and morphological data matrices. The term phylogenetics derives from the Greek terms phylé (φυλή) and phylon (φῦλον), denoting "tribe", "clan", "race" and the adjectival form, genetikós (γενετικός), of the word genesis (γένεσις) "origin", "source", "birth" (<http://en.wikipedia.org/wiki/Phylogenetics>). Phylogenetic analyses typically involve the identification of homologous sequences, their multiple alignment, the phylogenetic reconstruction and the graphical representation of the inferred phylogenic tree (Dereeper A.*, Guignon V.*, Blanc G., Audic S., Buffet S., Chevenet F., Dufayard J.F., Guindon S., Lefort V., Lescot M., Claverie J.M., Gascuel O. Phylogeny.fr: robust phylogenetic analysis for the non-specialist. Nucleic Acids Res. 2008 Jul 1;36(Web Server issue):W465-9. Epub 2008 Apr 19).
- **Phylogeography**: discipline that studies the historical processes controlling the geographic distributions of gene lineages.
- **PI**: Acronym for plant protease inhibitors are an interesting class of defense genes induced by insect feeding and mechanical damage.
- **pQTL** (Protein Quantitative Trait Loci): genomic regions correlated to the variation of protein levels.
- **Proteomics:** refers to genome-wide scanning of expressed proteins in cells (protein profiling).
- **PRR**: Acronym for pattern recognition receptors, the proteins, expressed by cells of the [innate immune system](http://en.wikipedia.org/wiki/Innate_immune_system) to identify [pathogen-associated molecular patterns](http://en.wikipedia.org/wiki/Pathogen-associated_molecular_patterns) (PAMPs), which are associated with microbial [pathogens](http://en.wikipedia.org/wiki/Pathogens). (<http://en.wikipedia.org/wiki/Pathogen-associated_molecular_pattern>)
- **QTL** (Quantitative Trait Loci): genomic regions correlated to the variation of a quantitative trait.
- **Reciprocal transplant**: a particular type of common garden, where local genotypes are compared to exotic genotypes, thus making it possible to test for local adaptation.
- **Repeated elements** (alias repetitive elements, or repeats): patterns of nucleic acids that occur in multiple copies throughout the genome.
- **Retrotransposons** (also called transposons via RNA intermediates): genetic elements that can amplify themselves in a genome and are ubiquitous components of the DNA of many eukaryotic organisms. LTR- retrotransposons are a class of retrotransoposons that have long terminal repeats (LTR) that range from ~100 bp to over 5 kb in size, on each side of their sequence. (<http://en.wikipedia.org/wiki/Retrotransposon>).
- **R-genes**: immune receptor conferring recognition of a pathogen-derived avirulence product (often an effector), resulting in the activation of host defense. (<http://en.wikipedia.org/wiki/R_gene>)
- **Selection (inclusive of natural selection and breeding)**: the process by which heritable traits become more or less frequent in a population as the organisms that carry them are able to differentially survive and reproduce under specific environmental conditions. It is one of the major processes that affects (reduces under directional selection or increases under disruptive or balancing selection) the genetic diversity of a population, but only for genes that have an effect on the phenotype.
- **SNP** (Single Nucleotide Polymorphism): a variation for a single nucleotide.
- **Somatic embryogenesis:** embryo development from one or a group of somatic cells (typically immature zygotic embryos in conifers). This is a vegetative multiplication process that mimics zygotic embryogenesis.
- **Standing genetic variation:** genetic variation that is currently present and segregating within a population; as opposed to allelic variation that appears by new mutations.
- **Subfonctionalization**: The evolutionary process by which each duplicate gene or cis-acting feature loses a different, complementary part of its ancestral function, but combined, they retain the full complement of their ancestral functions. For protein coding genes, subfunctionalization can happen at the level of protein function, or can happen in cis-acting regulatory sequences (e.g. CNSs). An example would be a gene with essential functions A and B that is duplicated. One duplicate loses function A; the other loses function B. As long as they are both present, they retaining the full function (A and B) of their preduplicated state. Example of the functions A and B are protein binding and phosphorylation, or expression in root and leaves. (<https://genomevolution.org/wiki/index.php/Main_Page>).
- **Taxon/taxa**: In biology, a taxon (plural taxa; back-formation from taxonomy) is a group of one or more populations of an organism or organisms seen by taxonomists to form a unit (Wikipedia).
- **Tracheids**: A tubular cell in the xylem of vascular plants that functions primarily in the conduction of water and mineral salts collected by the roots to other parts of the plant. It also provides structural support to plants (http://www.biology-online.org/dictionary).
- **Transcriptomics:** refers to genome-wide gene expression studies based on RNAs extracted from cells (establishment of transcript profiles).
- **Transcrition factors**: Transcription factors are proteins involved in the process of converting, or transcribing, DNA into RNA. Transcription factors include a wide number of proteins, excluding RNA polymerase, that initiate and regulate the transcription of genes. One distinct feature of transcription factors is that they have DNA-binding domains that give them the ability to bind to specific sequences of DNA called enhancer or promoter sequences. Some transcription factors bind to a DNA promoter sequence near the transcription start site and help form the transcription initiation complex. Other transcription factors bind to regulatory sequences, such as enhancer sequences, and can either stimulate or repress transcription of the related gene. These regulatory sequences can be thousands of base pairs upstream or downstream from the gene being transcribed. Regulation of transcription is the most common form of gene control. The action of transcription factors allows for unique expression of each gene in different cell types and during development. (<http://www.nature.com/scitable/definition/general-transcription-factor-transcription-factor-167>).
- **Whole genome duplication** (WGD): A whole genome duplication is exactly what it sounds like: an event which creates an organism with additional copies of the entire genome of a species. Regular cells of most organisms that reproduce sexually contain two copies of their entire genome (one inherited from each parent), a state known at being diploid. A whole genome duplication might result from an organism that inherited two copies of its genome from each parent (four copies total). A doubling from two to four copies of the genome is known as a tetraploidy. (<https://genomevolution.org/wiki/index.php/Main_Page>).
- **Zygotic embryogenesis:** developmental period following sexual reproduction that will lead to the formation of a mature embryo inside the seed.
