# Supplementary material for: Forest tree genomics: 10 achievements from the past 10 years and future prospects
Source: Springer Nature journal article supplement (doi:10.1007/s13595-015-0488-3), 2015-06-11
Supplement: MOESM2 [file 13595_2015_488_MOESM2_ESM.doc]

**A/** Selection of recent targeted gene expression studies of zygotic and somatic embryo development in conifers.

| **Embryogenesis stagea** | **Gene investigated** | **Species** | **Reference** |
| --- | --- | --- | --- |
| Pro to early embryogenesis (SE) | Somatic embryogenesis receptor-like kinase 1 (*AaSERK1*) | *Araucaria angustifolia* | Steiner et al. 2012 |
|  | Chitinase | *Pinus caribaea* | Domon et al. 2000 |
|  |  |  |  |
| Early embryogenesis (SE/ZE) | Glutamine synthetase (*GS1a, GS1b*) | *Pinus pinaster and Pinus sylvestris* | Pérez Rodríguez et al. 2006 |
|  |  |  |  |
| Early embryogenesis (SE) | Scarecrow-like protein (*SCR*) | *Araucaria angustifolia* | Schlögl et al. 2012 |
|  | Reversibly glycosylated polypeptides (*RGPs*) |  |  |
|  | Germin-like protein 1 (*LmGER1*) | *Larix* x *marschlinsii* | Mathieu et al. 2006 |
|  | APETALA2 domain TF (*LmAP2L1,*  *LmAP2L2)* | *Larix* x *marschlinsii* | Guillaumot et al. 2008 |
|  | Aquaglyceroporin (*PtNIP1;1*) | *Picea abies* | Ciavatta et al. 2002 |
|  | Lipid transfer protein (*LTP*) | *Picea abies* | Hjortswang et al. 2002 |
|  | Class IV chitinase (*Chia4-Pa*) | *Picea abies* | Wiweger et al. 2003 |
|  | Caspase-6-like (*mcII-Pa*) | *Picea abies* | Suarez et al. 2004 |
|  | Protein ARGONAUTE (*PgAGO*) | *Picea glauca* | Tahir et al. 2006 |
|  | Transcription factor viviparous 1 (*Pavp 1*) | *Picea abies* | Fischerova et al. 2008 |
|  | PIN1-like auxin transport protein (*PIN protein*) | *Picea abies* | Hakman et al. 2009 |
|  | Actin isoformes(*Pa1*, *Pa2*, *Pa3*, *Pa4*) | *Picea abies* | Schwarzerová et al. 2010 |
|  | Leafy cotyledon 1-like (*LEC1-type HAP3*) | *Picea abies* | Uddenberg et al. 2011 |
|  |  |  |  |
| Early embryogenesis (SE/ZE) | p34cdc2 protein kinase (*cdc2Pa*), | *Picea abies* | Footitt et al. 2003 |
|  | Transcription factor viviparous 1 (*Pavp 1*) |  |  |
|  | WUSCHEL-related homeobox (*PaWOX2*, *PaWOX8/9*) | *Picea abies* | Palovaara et al. 2010 |
|  |  |  |  |
| Late embryogenesis (SE) | Vicilin-like protein | *Araucaria angustifolia* | Schlögl et al. 2012 |
|  | Germin-like protein 1 (*LmGER1*) | *Larix* x *marschlinsii* | Mathieu et al. 2006 |
|  | APETALA2 domain TF (*LmAP2L1,*  *LmAP2L2)* | *Larix* x *marschlinsii* | Guillaumot et al. 2008 |
|  | Transcription factor viviparous 1 (*Pavp 1*) | *Picea abies* | Fischerova et al. 2008 |
|  | Actin isoformes(*Pa1*, *Pa2*, *Pa3*, *Pa4*) | *Picea abies* | Schwarzerová et al. 2010 |
|  | Protein ARGONAUTE (*PgAGO*) | *Picea glauca* | Tahir et al. 2006 |
|  | Late embryogenesis abundant protein (*LPZ 202*, *LPZ 216*) | *Pinus taeda* | Vales et al. 2007 |
|  | Late embryogenesis abundant protein (*LEA)* | *Pinus taeda* and *Pinus oocarpa* | Lara-Chavez et al. 2012 |
|  |  |  |  |
|  |  |  |  |
| Late embryogenesis | Homeobox protein 1 (*PaHB1*) | *Picea abies* | Ingouff et al. 2001 |
| (SE/ZE) | p34cdc2 protein kinase (*cdc2Pa*), | *Picea abies* | Footitt et al. 2003 |
|  | Transcription factor viviparous 1 (*Pavp 1*) |  |  |
|  | WUSCHEL-related homeobox (*PaWOX2*, *PaWOX8/9*) | *Picea abies* | Palovaara et al. 2010 |
|  | Receptor protein kinase CLAVATA-like (*CLV*) | *Pinus taeda* and *Pinu oocarpa* | Lara-Chavez et al. 2012 |
|  | Homeodomain-leucine zipper 1 (*HD-Zip 1*) |  |  |
|  | 26S proteasome regulatory subunit S2 (*RPN1*) |  |  |
|  | Legumin-like protein, Vicilin-like protein |  |  |
|  | Glutamine synthetase (*GS1a, GS1b*) | *Pinus pinaster* and *Pinus sylvestris* | Pérez Rodríguez et al. 2006 |
|  |  |  |  |
| Late embryogenesis  (ZE) | Receptor protein kinase CLAVATA1-like (*PipiCLV1L*, and *PipsCLV1L*) | *Pinus pinaster* and *Pinus pinea* | Alvarez et *al.* 2013 |
|  |  |  |  |

a SE: somatic embryo; ZE: zygotic embryo

**B/** Genome-wide profiling of zygotic and somatic embryo development in conifers

| **Embryogenesis stagea** | **Methodb** | **Species** | **Reference** |
| --- | --- | --- | --- |
| **Transcriptomics** |  |  |  |
| Proembryogenesis (SE) | NGS (454 pyrosequencing) | *Larix leptolepis* | Zhang et al. 2012a |
|  |  |  |  |
| Proembryogenesis (secondary SE) | 32 K oligo-probe microarray | *Picea glauca* | Rutledge et al. 2013 |
|  |  |  |  |
| Early embryogenesis (SE) | Differential screening of cDNA library | *Picea abies* | Van Zyl et al. 2003 |
|  | 17 K cDNA microarray | *Picea abies* | Vestman et al. 2011 |
|  | NGS (Illumina) | *Picea abies* | Yakovlev et al. 2014 |
|  | NGS (Illumina) | *Pinus pinaster* | Morel et al. 2014a |
|  |  |  |  |
| Early to late embryogenesis (SE) | 5' RACE | *Larix leptolepis* | Zhang et al. 2012b |
|  | 2 K cDNA microarray | *Picea abies* | Stasolla et al. 2004 |
|  | 2 K cDNA microarray | *Picea glauca* | Stasolla et al. 2003 |
|  | Differential screening of cDNA library + Southern hybridization | *Pinus radiata* | Bishop-Hurley et al. 2003 |
|  | cDNA-AFLP | *Pinus radiata* | Aquea and Arce-Johnson 2008 |
|  |  |  |  |
| Early to late embryogenesis (ZE) | 25 K cDNA microarray | *Pinus pinaster* | De Vega-Bartol et al. 2013 |
|  |  |  |  |
| Early to late embryogenesis (ZE/SE) | Differential screening of cDNA library | *Pinus taeda* | Cairney et al. 2000 |
|  | cDNA microarray | *Pinus taeda* | Pullman et al. 2003 |
|  |  |  |  |
| **Proteomics** |  |  |  |
| Early embryogenesis (SE) | 2D-PAGE + LC-MS/MS | *Araucaria angustifolia* | Balbuena et al. 2009 |
|  | 2D-PAGE + MS | *Araucaria angustifolia* | Jo et al. 2014 |
|  | 2D-PAGE + LC-MS/MS | *Pinus pinaster* | Morel et al. 2014a |
|  |  |  |  |
| Early embryogenesis (ZE) | 2D-DIGE + ESI-MS/MS | *Pinus massoniana* | Zhen et al. 2012 |
|  |  |  |  |
| Early to late embryogenesis (SE) | 2D-PAGE | *Cupressus sempervirens* | Sallandrouze et al. 1999 |
|  | 2D-PAGE + LC-MS/MS | *Larix* x *eurolepsis* | Teyssier et al. 2011 |
|  | 2D-PAGE + LC-MS/MS | *Picea glauca* | Lippert et al. 2005 |
|  |  |  |  |
| Early to late embryogenesis (SE/ZE) | NGS (Illumina) | *Araucaria angustifolia* | Elbl et al. 2014 |
|  |  |  |  |
| Early to late embryogenesis  (ZE) | 2D-PAGE + MS | *Araucaria angustifolia* | Silveira et al. 2008 |
|  | 2D-DIGE + LC-MS/MS | *Cunninghamia lanceolata* | Shi et al. 2010 |
| Late embryogenesis (SE) | 2D-PAGE + LC-MS/MS | *Larix × eurolepsis* | Teyssier et al. 2014 |
| Late embryogenesis  (SE/ZE) | 2D-PAGE + LC-MS/MS | *Pinus pinaster* | Morel et al. 2014b |
|  |  |  |  |
| Late embryogenesis and germination (SE) | 2D-PAGE + GC/MS | *Picea abies* | Businge et al. 2013 |
|  | 2D-PAGE + LC-MS/MS | *Araucaria angustifolia* | Balbuena et al. 2011 |
|  |  |  |  |
| **Metabolomics** |  |  |  |
| Early embryogenesis  (SE) | GC/MS | *Pinus taeda* | Robinson et al. 2009 |
|  |  |  |  |
| Early and late embryogenesis (SE) | NMR spectroscopy | *Picea glauca* | Dowlatabadi et al. 2009 |
|  |  |  |  |
| Late embryogenesis (SE) | GC/MS | *Picea abies* | Businge et al. 2012 |
| Late embryogenesis (SE) | GC/MS | *Picea abies* | Businge et al. 2013 |
|  |  |  |  |
|  |  |  |  |

a SE: somatic embryo; ZE: zygotic embryo

bNGS: next generation sequencing; 2D-PAGE: two-dimensional polyacrylamide gel electrophoresis; LC-MS/MS: liquid chromatography coupled with tandem mass spectrometry; GC-MS: gas chromatography coupled with mass spectrometry; NMR: nuclear magnetic resonance; 2D-DIGE : Difference gel electrophoresis; AFLP : Amplified fragment length polymorphism; 5' RACE : Rapid amplification of cDNA ends; ESI-MS/MS : Electrospray ionization coupled with tandem mass spectrometry

**C/** A synthetic representation of early physiological, cellular and molecular events (transcriptomic and proteomic inputs) revealed during somatic embryogenesis of maritime pine in presence of either low or high gellan gum concentration (Morel 2014; Morel et al. 2014a). ABA: abscisic acid; EM: embryonal masse, PCD: programmed cell death; SE: somatic embryo; **+** increase, -: decrease.

**References**

- Alvarez JM, Cortizo M, Bueno N, Rodríguez A, Ordás RJ (2013) CLAVATA1-LIKE, a leucine-rich-repeat protein receptor kinase gene differentially expressed during adventitious caulogenesis in *Pinus pinaster* and *Pinus pinea*. Plant Cell Tiss Org Cult 112:331-342
- Aquea F, Arce-Johnson P (2008) Identification of genes expressed during early somatic embryogenesis in Pinus radiata. Plant Physiol Bioch 46:559-568
- Balbuena TS, Jo L, Pieruzzi FP, Dias LL, Silveira V, Santa-Catarina C, Floh EIS (2011) Differential proteome analysis of mature and germinated embryos of *Araucaria angustifolia*. Phytochemistry 72:302-311
- Balbuena TS, Silveira V, Junqueira M, Dias LLC, Santa-Catarina C, Shevchenko A, Floh EIS (2009) Changes in the 2-DE protein profile during zygotic embryogenesis in the Brazilian Pine (*Araucaria angustifolia*). J Proteomics 72:337-352
- Bishop-Hurley SL, Gardner RC, Walter C (2003) Isolation and molecular characterization of genes expressed during somatic embryo development in *Pinus radiata*. Plant Cell Tiss Org Cult 74:267-281
- Businge E, Brackmann K, Moritz T, Egertsdotter U (2012) Metabolite profiling reveals clear metabolic changes during somatic embryo development of Norway spruce (*Picea abies*). Tree Physiol 32:232-244
- Businge E, Bygdell J, Wingsle G, Moritz T, Egertsdotter U (2013) The effect of carbohydrates and osmoticum on storage reserve accumulation and germination of Norway spruce somatic embryos. Physiol Plant 149:273-285
- Cairney J, Xu N, MacKay J, Pullman J (2000) Transcript profiling: a tool to assess the development of conifer embryos. In Vitro Cell Dev Biol-Plant 36:155-162
- Ciavatta VT, Egertsdotter U, Clapham D, von Arnold S, Cairney J (2002) A promoter from the loblolly pine PtNIP1;1 gene directs expression in an early-embryogenesis and suspensor-specific fashion. Planta 215:694-698
- de Vega-Bartol JJ, Simões M, Lorenz WW, Rodrigues AS, Alba R, Dean JFD, Miguel C (2013) Transcriptomic analysis highlights epigenetic and transcriptional regulation during zygotic embryo development of *Pinus pinaster*. BMC Plant Biol 13:123
- Domon J-M, Neutelings G, Roger D, David A, David H (2000) A basic chitinase-like protein secreted by embryogenic tissues of *Pinus caribaea* acts on arabinogalactan proteins extracted from the same cell lines. J Plant Physiol 156:33-39
- Dowlatabadi R, Weljie AM, Thorpe TA, Yeung EC, Vogel HJ (2009) Metabolic footprinting study of white spruce somatic embryogenesis using NMR spectroscopy. Plant Physiol Biochem 47:343-350
- Elbl P, Lira BS, Andrade SCS, Jo L, dos Santos ALW, Coutinho LL, Floh EIS, Rossi M (2014) Comparative transcriptome analysis of early somatic embryo formation and seed development in Brazilian pine, *Araucaria angustifolia* (Bertol.) Kuntze. Plant Cell Tiss Org Cult (in press)
- Footitt S, Ingouff M, Clapham D, von Arnold S (2003) Expression of the viviparous 1 (Pavp1) and p34cdc2 protein kinase (cdc2Pa) genes during somatic embryogenesis in Norway spruce (*Picea abies* [L.] Karst). J Exp Bot 54:1711-1719
- Fischerova L, Fischer L, Vondrakova Z, Vagner M (2008) Expression of the gene encoding transcription factor PaVP1 differs in *Picea abies* embryogenic lines depending on their ability to develop somatic embryos. Plant Cell Rep 27:435-441
- Guillaumot D, Lelu-Walter MA, Germot A, Meytraud F, Gastinel L, Riou-Khamlichi C (2008) Expression patterns of LmAP2L1 and LmAP2L2 encoding two-APETALA2 domain proteins during somatic embryogenesis and germination of hybrid larch (*Larix x marschlinsii*). J Plant Physiol 165:1003-1010
- Hakman I, Hallberg H, Palovaara J (2009) The polar auxin transport inhibitor NPA impairs embryo morphology and increases the expression of an auxin efflux facilitator protein PIN during Picea abies somatic embryo development. Tree Physiol 29:483-496
- Hjortswang H I, Filonova LH, Vahala T, von Arnold S (2002) Modified expression of the Pa18 gene interferes with somatic embryo development in Norway spruce. Plant Growth Reg 38:75-82
- Ingouff M, Farbos I, Lagercrantz U, von Arnold S (2001) PaHB1 is an evolutionary conserved HD‐GL2 homeobox gene expressed in the protoderm during Norway spruce embryo development. Genesis 30:220-230
- Jo L, dos Santos ALW, Bueno CA, Barbosa HR, Floh EIS (2014) Proteomic analysis and polyamines, ethylene and reactive oxygen species levels of *Araucaria angustifolia* (Brazilian pine) embryogenic cultures with different embryogenic potential. Tree Physiol 34:94-104
- Lara-Chavez A, Egertsdotter U, Flinn BS (2012) Comparison of gene expression markers during zygotic and somatic embryogenesis in pine. In Vitro Cell Dev Biol-Plant 48:341-354
- Lippert D, Zhuang J, Ralph S, Ellis DE, Gilbert M, Olafson R, Ritland K, Ellis B, Douglas CJ, Bohlmann J (2005) Proteome analysis of early somatic embryogenesis in *Picea glauca*. Proteomics 5:461-473
- Mathieu M, Lelu-Walter M-A, Blervacq AS, David H, Hawkins S, Neutelings G (2006) Germin-like genes are expressed during somatic embryogenesis and early development of conifers. Plant Mol Biol 61:615-627
- Morel A (2014) Physiologie moléculaire du développement des embryons somatiques de pin maritime (*Pinus pinaster* Ait.): approches transcriptomique et protéomique. Dissertation, University Orléans, France, pp310
- Morel A, Teyssier C, Trontin JF, Pešek B, Eliášová K, Beaufour M, Morabito D, Boizot N, Le Metté C, Belal-Bessai L, Reymond I, Harvengt L, Cadene M, Corbineau F, Vágner M, Label P, Lelu-Walter MA (2014a). Early molecular events involved in *Pinus pinaster* Ait. somatic embryo development under reduced water availability: transcriptomic and proteomic analysis. Physiol Plant 152:184-201
- Morel A, Trontin JF, Corbineau F, Lomenech A-M, Beaufour M, Reymond I, Le Metté C, Ader K, Harvengt L, Cadene M, Label P, Teyssier C, Lelu-Walter M-A (2014b) Cotyledonary somatic embryos of *Pinus pinaster* Ait. most closely resemble fresh, maturing cotyledonary zygotic embryos: biological, carbohydrate and proteomic analyses. Planta (in press)
- Palovaara J, Hallberg H, Stasolla C, Hakman I (2010) Comparative expression pattern analysis of WUSCHEL-related homeobox 2 (WOX2) and WOX8/9 in developing seeds and somatic embryos of the gymnosperm *Picea abies*. New Phytol 188:122-135
- Pérez Rodríguez MJ, Fernanda Suárez M, Heredia R, Ávila C, Breton D, Trontin JF, Filonova L, Bozhkov P, von Arnold S, Harvengt L, Cánovas FM (2006) Expression patterns of two glutamine synthetase genes in zygotic and somatic pine embryos support specific roles in nitrogen metabolism during embryogenesis. New Phytol 169:35-44
- Pullman GS, Johnson S, Peter G, Cairney J, Xu N (2003) Improving loblolly pine somatic embryo maturation: comparison of somatic and zygotic embryo morphology, germination, and gene expression. Plant Cell Rep 21:747-758
- Robinson AR, Dauwe R, Ukrainetz NK, Cullis IF, White R, Mansfield SD (2009) Predicting the regenerative capacity of conifer somatic embryogenic cultures by metabolomics. Plant Biotech J 7:952-963
- Rutledge RG, Stewart D, Caron S, Overton C, Boyle B, MacKay J, Klimaszewska K (2013) Potential link between biotic defense activation and recalcitrance to induction of somatic embryogenesis in shoot primordia from adult trees of white spruce (*Picea glauca*). BMC Plant Biol 13:116
- Sallandrouze A, Faurober, M, El Maataoui M, Espagnac H (1999) Two‐dimensional electrophoretic analysis of proteins associated with somatic embryogenesis development in *Cupressus sempervirens* L. Electrophoresis 20:1109-1119
- Schlögl PS, dos Santos ALW, do Nascimento Vieira L, Floh EIS, Guerra MP (2012) Gene expression during early somatic embryogenesis in Brazilian pine (*Araucaria angustifolia* (Bert) O. Ktze). Plant Cell Tiss Org Cult 108:173-180
- Schwarzerová K, Vondráková Z, Fischer L, Boříková P, Bellinvia E, Eliášová K, Havelková L, Fišerova J, Opatrný Z (2010) The role of actin isoforms in somatic embryogenesis in Norway spruce. BMC Plant Biol 10:89
- Shi J, Zhen Y, Zheng RH (2010) Proteome profiling of early seed development in Cunninghamia lanceolata (Lamb.) Hook. J Exp Bot 61:2367-2381
- Silveira V, Santa-Catarina C, Balbuena TS, Moraes FMS, Ricart CAO, Sousa MV, Floh EIS (2008) Endogenous abscisic acid and protein contents during seed development of *Araucaria angustifolia*. Biol Plant 52:101-104
- Stasolla C, Bozhkov PV, Chu TM, Van Zyl L, Egertsdotter U, Suarez MF, Craig D, Wolfinger RD, Von Arnold S Sederoff RR (2004) Variation in transcript abundance during somatic embryogenesis in gymnosperms. Tree Physiol 24:1073-1085
- Stasolla C, van Zyl L, Egertsdotter U, Craig D, Liu W, Sederoff RR (2003) The effects of polyethylene glycol on gene expression of developing white spruce somatic embryos. Plant Physiol 131:49-60
- Steiner N, Santa-Catarina C, Guerra MP, Cutri L, Dornelas MC, Floh EI (2012) A gymnosperm homolog of SOMATIC EMBRYOGENESIS RECEPTOR-LIKE KINASE-1 (SERK1) is expressed during somatic embryogenesis. Plant Cell Tiss Org Cult 109:41-50
- Suarez MF, Filonova LH, Smertenko A, Savenkov EI, Clapham DH, von Arnold S, Zhivotovsky B, Bozhkov PV (2004) Metacaspase-dependent programmed cell death is essential for plant embryogenesis. Current Biol 14:R339-R340
- Tahir M, Law DA, Stasolla C (2006) Molecular characterization of PgAGO, a novel conifer gene of the ARGONAUTE family expressed in apical cells and required for somatic embryo development in spruce. Tree Physiol 26:1257-1270
- Teyssier C, Grondin C, Bonhomme L, Lomenech AM, Vallance M, Morabito D, Label P, Lelu-Walter MA (2011) Increased gelling agent concentration promotes somatic embryo maturation in hybrid larch (*Larix x eurolepsis*): a 2-DE proteomic analysis. Physiol Plant 141:152-165
- Teyssier C, Maury S, Beaufour M, Grondin C, Delaunay A, Le Metté C, Ader K, Cadene M, Label P, Lelu-Walter MA (2014) In search of markers for somatic embryo maturation in hybrid larch (*Larix x eurolepis*): global DNA methylation and proteomic analyses. Physiol Plant 150:271-291
- Uddenberg D, Valladares S, Abrahamsson M, Sundstrom J, Sundas-Larsson A, von Arnold S (2011) Embryogenic potential and expression of embryogenesis related genes in conifers are affected by treatment with a histone deacetylase inhibitor. Planta 234:527-539
- Vales T, Feng X, Ge L, Xu N, Cairney J, Pullman GS, Peter GF (2007) Improved somatic embryo maturation in loblolly pine by monitoring ABA-responsive gene expression. Plant Cell Rep 26:133-143
- van Zyl L, Bozhkov PV, Clapham DH, Sederoff RR, von Arnold S (2003) Up, down and up again is a signature global gene expression pattern at the beginning of gymnosperm embryogenesis. Gene Expres Patt 3:83-91
- Vestman D, Larsson E, Uddenberg D, Cairney J, Clapham D, Sundberg E, von Arnold S (2011) Important processes during differentiation and early development of somatic embryos of Norway spruce as revealed by changes in global gene expression. Tree Genet Genomes 7:347–362
- Yakovlev IA, Lee Y, Rotter B, Olsen JE, Skrøppa T, Johnsen Ø, Fossdal CG (2014) Temperature-dependent differential transcriptomes during formation of an epigenetic memory in Norway spruce embryogenesis. Tree Genet Genomes 10:355-366
- Zhang Y, Zhang S, Han S, Li X, Qi L (2012a) Transcriptome profiling and in silico analysis of somatic embryos in Japanese larch (*Larix leptolepis*). Plant Cell Rep 31:1637-1657
- Zhang J, Zhang S, Han S, Wu T, Li X, Li W, Qi L (2012b). Genome-wide identification of microRNAs in larch and stage-specific modulation of 11 conserved microRNAs and their targets during somatic embryogenesis. Planta 236:647-657
- Zhen Y, Zhao ZZ, Zheng RH, Shi J (2012) Proteomic analysis of early seed development in *Pinus massoniana* L. Plant Physiol Biochem 54:97-104
