# Supplementary material for: Forest tree genomics: 10 achievements from the past 10 years and future prospects
Source: Springer Nature journal article supplement (doi:10.1007/s13595-015-0488-3), 2015-06-11
Supplement: MOESM4 [file 13595_2015_488_MOESM4_ESM.doc]

| **FAMILY** | **EXPERIMENTAL DESIGN** | **ANALYSIS OF DNA METHYLATION** | **MAIN CONCLUSION** | **REFERENCES**  **s(see below)** |
| --- | --- | --- | --- | --- |
| *SALICACEAE* | 3 *Populus* triploids with their diploids and/or tetraploids parents * greenhouse | MSAP | DNA methylation is nonlinearly related to the ploidy level | Li et al. 2011 |
| 3andromonoecious *Populus* *tomentosa* clones * nursery * flower development | MSAP | DNA methylation sites have the potential to regulate the genes’ transcript levels | Song et al. 2012 |
| 9 populations of 432 individuals of *Populus* *tomentosa* with distinct origins * outdoor | MSAP | Genome methylation presented tissue-specific characteristics | Ma et al. 2013 |
| 1 *Populus alba clone* * metal-polluted site or not * inoculation with fungi *G. mosseae* or *G. intraradices* or not | MSAP | DNA methylation would adapt gene expression in response to biotic and abiotic stress | Cicatelli et al. 2014 |
| 10 subpopulations *Populus* *trichocarpa* with distinct origins * greenhouse | MeDIP-SEQ | DNA in recombination hotspots is less methylated | Slavov et al. 2012 |
| 1 *Populus* *trichocarpa* clone * outdoor | MeDIP-SEQ | DNA methylation is tissue specific and gene-body DNA methylation has a more repressive effect on transcription than promoter methylation | Vining et al. 2012 |
| 1 *Populus* *trichocarpa* clone * *in vitro* | MeDIP-SEQ | DNA methylation varies in a highly gene- and chromosome-differential manner during *in vitro* differentiation and regeneration. Hypermethylation of gene bodies may serve a protective role against activation of abundant transposable elements | Vining et al. 2013 |
| 1 *Populus* *trichocarpa* clone * greenhouse | MeDIP-SEQ | Methylated DNase 1 hypersensitive sites covered 1.9 % of the poplar geome but contains 74 % of genes models. Euchromatin gene body DNA methylation depends on structural gene characteristics (gene size, redundancy and tissue-specific expression) | Lafon-Placette et al. 2013 |
| 2 intraspecific *Populus* *deltoides* parental lines and their reciprocal hybrids * greenhouse and outside | MeDIP-SEQ | The methylation patterns of the parents both partially and dynamically passed onto their hybrids and F1 hybrids has a non-additive methylation level | Gao et al. 2014 |
| 1 Populus *tremula* x *alba* clone * PtDDM1-RNAi transgenic lines * *in vitro* and greenhouse | Genomic decrease of DNA methylation using RNAi strategy | First report for a DNA methylation modified-tree. The phenotypic consequences of reduced *DDM1* activity and DNA methylation appears to increase with cumulative plant propagation and growth | Zhu et al. 2013 |
| 1 *Populus* *trichocarpa* clone * greenhouse | WGBS-SEQ | If patterns of methylation are very similar in flowering plants, CHG methylation levels in transposons and repeats were much higher in poplar | Feng et al. 2010 |
| 1 *Populus* *trichocarpa* clone * greenhouse * water stress and control | WGBS-SEQ | DNA methylation in response to stress regulates genes by methylating TEs in promoters and gene body of transcription factors | Liang et al. 2014 |
| *PINACEAE* | *1 Pinus* *pinaster* clone * *in vitro* somatic embryogenesis * 5-azacytidine treatment | MSAP | DNA methylation variations during aging of embryogenic cultures and in response to 5-azacytidine treatment | Klimaszewska et al. 2009 |
| 25 individuals *Pinus* *radiata* * outdors and *in vitro* | MSAP | DNA methylation variations during needle maturation in relation to the loss of in vitro organogenic capability | Valledor et al. 2010 |
| 5 *Pinus* *pinea* natural populations with 20 individuals * climatic chamber | MSAP | Variable epigenetic markers discriminate individuals and differentiates two well represented populations contrary to genetic variation | Saez-Laguna et al. 2014 |
| *FAGACEAE* | *1 Acacia mangium willd clone* * *in vitro* aging | MSAP | Differences in DNA methylation exist between juvenile and mature plant materials | Baurens et al. 2004 |
| *1 Quercus* *suber* clone * outdoor and greenhouse * 4 distinct temperatures | MSAP | DNA methylation variations under a high temperature stress | Correia et al. 2013 |
| 1 natural population of *Quercus* *ilex* * outdoor * drought or control | MSAP | DNA methylation variations under drought | Rico et al. 2014 |
| *ARECACEAE* | 1 *Elaeis guineensis Jacq.* clone * *in vitro* normal and mantled somatic embryos | MSAP | DNA methylation polymorphism discriminates between the two phenotypes (normal and mantled) only when they were from the same genetic origin | Jaligot et al. 2004 |
| *COMBRETACEAE* | *2 populations Laguncularia racemosa* * outdoors salt marsh and riverside | MSAP | Higher DNA methylation differentiation than genetic one between adapted populations to distinct environment | Lira-Medeiros et al. 2010 |
| *STERCULIACEAE* | 114 regenerants of one *Theobroma cacao* clone * *in vitro* | MSAP | Short periods of callus growth induce variations of DNA methylation during regeneration process | Rodriguez Lopez et al. 2010 |
| *EUPHORBIACEAE* | 56 *Jatropha curcas* individuals from distinct origins * gamma-irradiation or not | MSAP | DNA methylation polymorphism is observed between indivuduals and in response to gamma-irradiation | Kanchanaketu et al. 2012 |
| *RUBIACEAE* | 145 individuals of 2 hybrids *Coffea arabica* * *in vitro* | MSAP | Very low level of DNA methylation variation from somatic embryos to regenerated plants | Bobadilla Landey et al. 2013 |

References

- Baurens FC, Nicolleau J, Legavre T, Verdeil JL, Monteuuis O (2004) Genomic DNA methylation of juvenile and mature Acacia mangium micropropagated in vitro with reference to leaf morphology as a phase change marker. Tree Physiol 24:401-407
- Bobadilla Landey R, Cenci A, Georget F, Bertrand B, Camayo G, Dechamp E, Herrera JC, Santoni S, Lashermes P, Simpson J, Etienne H (2013) High genetic and epigenetic stability in *Coffea arabica* plants derived from embryogenic suspensions and secondary embryogenesis as revealed by AFLP, MSAP and the phenotypic variation rate. PLoS ONE 8:e56372
- Cicatelli A, Todeschini V, Lingua G, Biondi S, Torrigiani P, Castiglioneet S (2014) Epigenetic control of heavy metal stress response in mycorrhizal versus non-mycorrhizal poplar plants. Environ Sci Pollut R 21:1723-1737
- Correia B, Valledor L, Meijón M, Rodriguez JR, Dias MC, Santos C, Canal MJ, Rodriguez R, Pinto G (2013) Is the interplay between epigenetic markers related to the acclimation of cork oak plants to high temperatures? PLoS ONE 8:e53543
- Feng S, Cokus SJ, Zhang X, Chen PY, Bostick M, Goll MG, Hetzel J, Jain J, Strauss SH, Halpern ME, Ukomadu C, Sadler KC, Pradhan S, Pellegrini M, Jacobsen SE (2010) Conservation and divergence of methylation patterning in plants and animals. Proc Natl Acad Sci USA 107:8689-8694
- Gao M, Huang Q, Chu Y, Ding C, Zhang B, Su X (2014) Analysis of the leaf methylomes of parents and their hybrids provides new insight into hybrid vigor in *Populus deltoides*. BMC Genetics 15:S8
- Jaligot E, Beulé T, Baurens FC, Billotte N, Rival A (2004) Search for methylation-sensitive amplification polymorphisms associated with the “mantled” variant phenotype in oil palm (*Elaeis guineensis* Jacq.). Genome 47:224-228
- Kanchanaketu T, Sangduen N, Toojinda T, Hongtrakul V (2012) Genetic diversity analysis of Jatropha curcas L.(Euphorbiaceae) based on methylation-sensitive amplification polymorphism. Genet Mol Res 11:944-955
- Klimaszewska K, Noceda C, Pelletier G, Label P, Rodriguez R, Lelu-Walter MA (2009) Biological characterization of young and aged embryogenic cultures of *Pinus* *pinaster* (Ait.). *In Vitro* Cellular and Developmental Biology – Plant 45: 20-33
- Klimaszewska K, Overton C, Stewart D, Rutledge RG (2011) Initiation of somatic embryos and regeneration of plants from primordial shoots of 10-year-old somatic white spruce and expression profiles of 11 genes followed during the tissue culture process. Planta 233: 635-647
- Lafon-Placette C, Faivre-Rampant P, Delaunay A, Street N, Brignolas F, Maury S (2013) Methylome of DNase I sensitive chromatin in *Populus trichocarpa* shoot apical meristematic cells: a simplified approach revealing characteristics of gene-body DNA methylation in open chromatin state. New Phytol 197:416-430
- Li A, Hu B-Q, Xue Z-Y, Chen L, Wang W-X, Song W-Q, Chen C-B, Wang C-G (2011) DNA methylation in genomes of several annual herbaceous and woody perennial plants of varying ploidy as detected by MSAP. Plant Mol Biol Rep 29:784-793
- Liang D, Zhang Z, Wu H, Huang C, Shuai P, Ye C-Y, Tang S, Wang Y, Yang L, Wang J, Yin W, Xia W (2014) Single-base-resolution methylomes of *Populus trichocarpa* reveal the association between DNA methylation and drought stress. BMC Genetics 15:S9
- Lira-Medeiros CF, Parisod C, Fernandes RA, Mata CS, Cardoso MA, Gomes Ferreira PC (2010) Epigenetic variation in mangrove plants occurring in contrasting natural environment. PLoS ONE 5:e10326
- Ma K, Song Y, Yang X, Zhang Z, Zhang D (2013) Variation in genomic methylation in natural populations of chinese white poplar. PLoS ONE 8:e63977
- Rico L, Ogaya R, Barbeta A, Peñuelas J (2014) Changes in DNA methylation fingerprint of *Quercus ilex* trees in response to experimental field drought simulating projected climate change. Plant Biol 16:419-427
- Rodríguez López CM, Wetten AC, Wilkinson MJ (2010) Progressive erosion of genetic and epigenetic variation in callus-derived cocoa (*Theobroma cacao*) plants. New Phytol 186:856-868
- Sáez-Laguna E, Guevara M-Á, Díaz L-M, Sanchez-Gomez D, Collada C, Aranda I, Cervera M-T (2014) Epigenetic variability in the genetically uniform forest tree species *Pinus pinea* L. PLoS ONE 9:e103145
- Slavov GT, DiFazio SP, Martin J, Schackwitz W, Muchero W, Rodgers-Melnick E, Lipphardt MF, Pennacchio CP, Hellsten U, Pennacchio LA, Gunter LE, Ranjan P, Vining K, Pomraning KR, Wilhelm LJ, Pellegrini M, Mockler TC, Freitag M, Geraldes A, El-Kassaby YA, Mansfield SD, Cronk QCB, Douglas CJ, Strauss SH, Rokhsar D, Tuskan GA, 2012. Genome resequencing reveals multiscale geographic structure and extensive linkage disequilibrium in the forest tree *Populus trichocarpa*. New Phytol 196:713-725
- Song Y, Ma K, Bo W, Zhang Z, Zhan D (2012) Sex-specific DNA methylation and gene expression in andromonoecious poplar. Plant Cell Rep 31:1393-1405
- Valledor L, Meijón M, Hasbún R, Cañala MJ, Rodríguez R (2010) Variations in DNA methylation, acetylated histone H4, and methylated histone H3 during *Pinus radiata* needle maturation in relation to the loss of in vitro organogenic capability. J Plant Physiol 167:351-357
- Vining K, Pomraning KR, Wilhelm LJ, Ma C, Pellegrini M, Di Y, Mockler TC, Freitag M, Strauss SH (2013) Methylome reorganization during in vitro dedifferentiation and regeneration of Populus trichocarpa. BMC Plant Biol 13:92
- Vining KJ, Pomraning KR, Wilhelm LJ, Priest HD, Pellegrini M, Di Y, Mockler TC, Freitag M, Strauss SH (2012) Dynamic DNA cytosine methylation in the *Populus trichocarpa* genome: tissue-level variation and relationship to gene expression. BMC Genomics 13:27
- Zhu R, Shevchenko O, Ma C, Maury S, Freitag M, Strauss SH (2013) Poplars with a PtDDM1-RNAi transgene have reduced DNA methylation and show aberrant post-dormancy morphology. Planta 237:1483-1493
